# Supplementary material for: Ion-gating synaptic transistors with long-term synaptic weight modulation
Source: Royal Society of Chemistry journal article supplement (doi:10.1039/d1tc00048a), 2021-01-01
Supplement: d1tc00048a1.pdf [file d1tc00048a1.pdf]

## Supplementary Information

### **Ion-gating synaptic transistors with long-term synaptic weight modulation**

*Youngjun Park, Min-Kyu Kim, and Jang-Sik Lee\**

Department of Materials Science and Engineering, Pohang University of Science and Technology (POSTECH), Pohang 37673, Korea.

\*Corresponding Author. E-mail: [jangsik@postech.ac.kr](mailto:jangsik@postech.ac.kr)

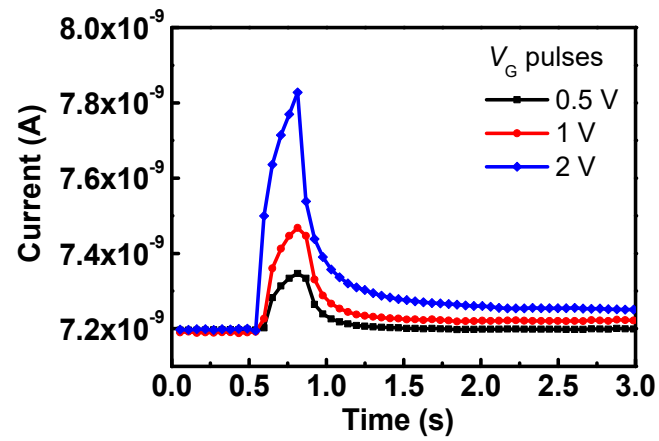

**Figure S1.** Changes in  $I_D$  by applying  $V_G$  pulses with different amplitudes (0.5 V, 1 V, 2 V) at the fixed pulse width (250 ms).

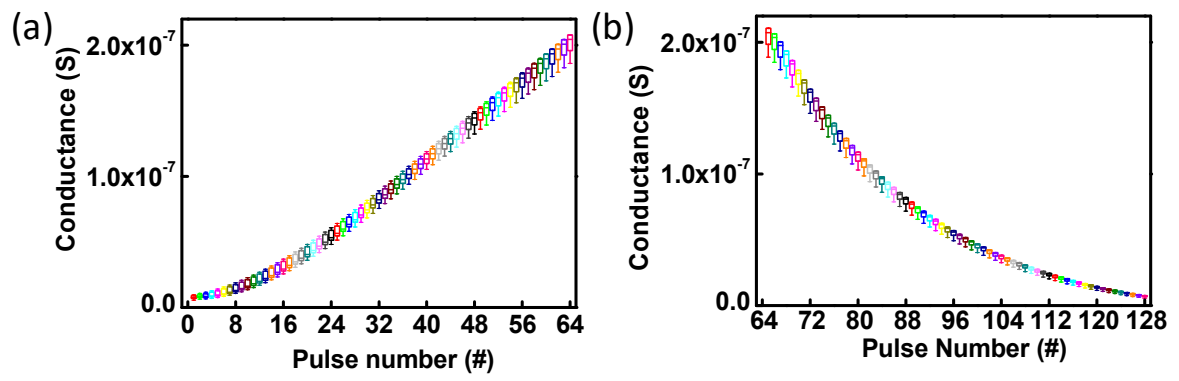

**Figure S2.** Cycle-to-cycle variation of (a) potentiation and (b) depression characteristics. 25 cycles of potentiation and depression are plotted.

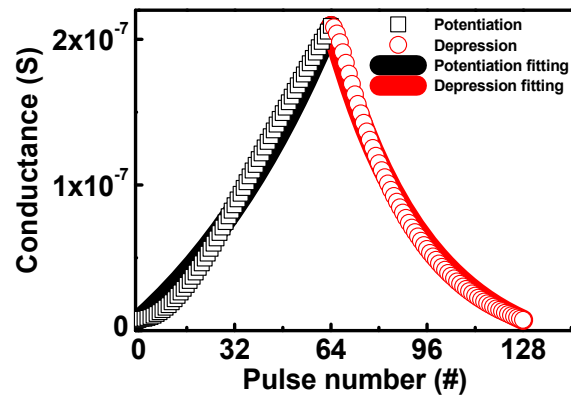

**Figure S3.** Fitted curves for potentiation and depression of a synaptic transistor.

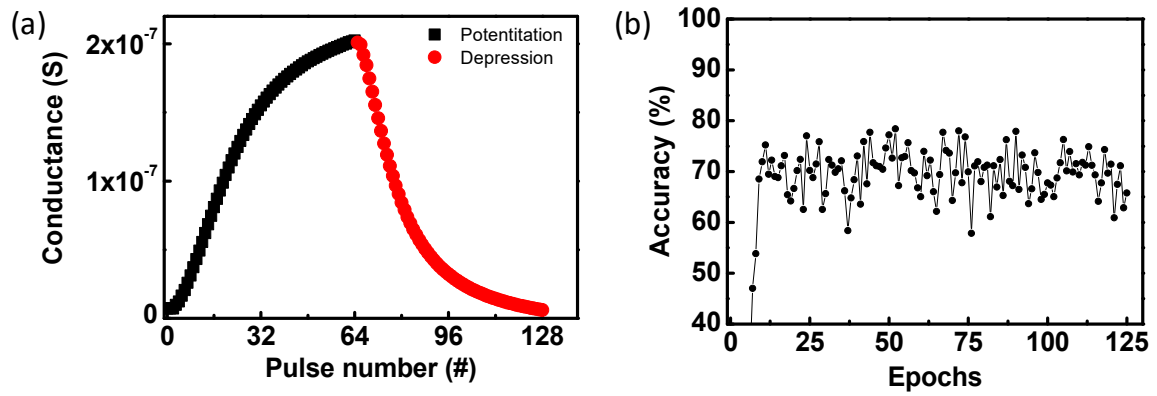

**Figure S4.** (a) Potentiation and depression characteristics during application of 64 consecutive identical positive  $V_G$  pulses (9 V), then 64 consecutive negative  $V_G$  pulses (-8 V). (b) Simulation of recognition accuracy for ANN that uses potentiation and depression obtained by pulses with identical amplitude.

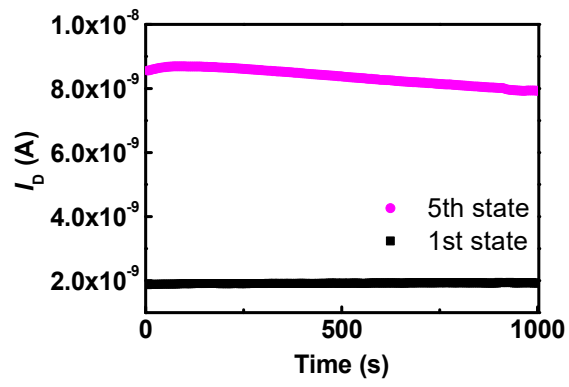

**Figure S5.** Data retention properties of synaptic transistors with the threshold switch at 1st and 5th synaptic states after positive  $V_G$  sweeps from 0 V to 2 V.
